# Supplementary material for: Loss of Doc2b does not influence transmission at Purkinje cell to deep nuclei synapses under physiological conditions
Source: eLife. 2020 Apr 29;9:e55165. doi: 10.7554/eLife.55165 (PMC7190354; doi:10.7554/eLife.55165)
Supplement: Figure 1—source data 1. [file elife-55165-fig1-data1.xlsx]

## Sheet: Fig 1 E-F
DCN adult minis (Figure 1 E-F)
Wildtype				Doc2b KO
Cell	mIPSC freq (Hz)	mIPSC amp (pA)		Cell	mIPSC freq (Hz)	mIPSC amp (pA)
1	35.8227	59.5099		1	51.3919	51.7518
2	50.6802	69.7406		2	18.8488	78.0103
3	56.4149	90.0111		3	84.7522	113.002
4	53.6408	62.7487		4	80.8033	84.8342
5	54.4478	64.7524		5	53.2132	57.7509
6	41.7547	65.1291		6	73.6848	82.226
7	88.95	87.7385		7	49.6287	48.4354
8	17.862	40.9721		8	92.7228	109.392
9	42.8161	52.0275		9	54.7879	89.8687
10	52.1441	58.797		10	24.0882	83.8683
11	66.7505	105.294		11	35.9474	75.8086
12	68.5532	102.516		12	30.2833	51.3522
13	64.3473	64.0888
14	54.5015	62.0432
Average	53.4776	70.3835		Average	54.1794	77.1917
Std	16.1054	18.1646		Std	23.4459	20.6773
Stde	4.30436	4.85469		Stde	6.76825	5.96901

## Sheet: Fig 1 G-H
DCN young minis (Figure 1 G-H)
Wildtype				Doc2b KO
Cell	mIPSC freq (Hz)	mIPSC amp (pA)		Cell	mIPSC freq (Hz)	mIPSC amp (pA)
1	56.8974	94.5703		1	31.2174	33.4893
2	58.4335	78.9458		2	32.9232	36.3429
3	71.698	64.864		3	16.6065	40.4659
4	63.512	170.243		4	100.419	102.728
5	66.8591	68.589		5	104.076	114.122
6	50.0251	71.3954		6	68.2712	92.8507
7	17.6908	58.5549		7	88.4382	80.9544
8	57.1057	68.1404		8	67.04	62.031
9	43.4223	63.8918		9	72.4513	86.3984
10	55.1171	49.6762		10	86.4622	92.761
11	53.7431	66.6776		11	62.979	60.3876
12	45.735	56.8395		12	58.4955	66.4252
13	49.0456	99.2087		13	70.8394	60.7311
14	72.575	73.3928		14	50.2712	81.3891
15	81.7262	88.9346		15	64.0047	75.1077
16	46.8466	47.3014		16	16.0528	44.4382
17	7.64809	44.0907		17	14.3422	42.4642
18	14.0544	45.5821		18	14.1037	56.5692
19	19.4738	53.6416		19	13.6021	35.1444
20	25.1606	59.3531		20	21.2666	43.1827
Average	47.8385	71.1946		Average	52.6931	65.3991
Std	20.3967	27.2856		Std	29.7909	23.7679
Stde	4.56085	6.10125		Stde	6.66145	5.31465

## Sheet: Fig 1-S3
PC-PC collateral minis (Figure 1 - figure supplement 3)
Wildtype				Doc2b KO
Cell	mIPSC freq (Hz)	mIPSC amp (pA)		Cell	mIPSC freq (Hz)	mIPSC amp (pA)
1	1.9	111.78		1	8.43	50.46
2	2.34	101.24		2	5.27	52.05
3	3.69	66.88		3	2.83	52.3
4	4.18	60.81		4	0.31	78.23
5	5.43	45.26		5	0.67	50.71
6	3.45	72.9		6	0.93	109.19
7	8.63	99.62		7	1.48	153.56
8	5.08	129.99		8	1.14	64.39
9	10.11	100.14		9	2.44	108.82
10	6.94	105.19		10	0.88	82.34
11	2.03	108.03		11	0.99	74.54
12	4.3	63.97		12	1.64	120.91
13	8.89	32.91		13	1.57	56.85
14	3.03	39.31		14	0.83	265.94
15	4.45	42.08		15	2.34	71.23
16	2.51	25.28		16	1.06	112.14
17	1.18	136.22		17	1.18	74.71
18	22.01	133.76		18	3.79	48.18
19	3.97	177.92		19	6.13	163.01
20	23.33	50.52		20	1.61	64.42
21	7.69	65.68		21	1.01	38.36
22	8.44	61.52		22	1.04	48.68
23	2.36	146.97		23	1.57	55.47
24	8.2	48.08		24	2.5	47.19
25	6.41	69.86		25	0.35	51.53
				26	2.16	68.71
				27	3.25	41.3
				28	2.68	60.27
				29	0.82	52.45
				30	0.9	41.82
				31	6.5	31.93
				32	0.97	51.92
				33	1.12	40.93
				34	2.77	62.22
				35	3.47	63.22
				36	4.48	50.53
Average	6.422	83.8368		Average	2.25306	73.9031
Std	5.3972	39.4078		Std	1.85696	44.3816
Stde	1.07944	7.88156		Stde	0.309494	7.39694

## Sheet: Fig 1 -S4
PF-PC mEPSCs (Figure 1 - figure supplement 4)
Wildtype				Doc2b KO
Cell	mIPSC freq (Hz)	mIPSC amp (pA)		Cell	mIPSC freq (Hz)	mIPSC amp (pA)
1	0.59	38.39		1	0.02	37.95
2	0.22	20.62		2	0.38	22.07
3	0.71	22.8		3	0.65	27.58
4	0.24	35.49		4	0.69	26.02
5	2.68	31.75		5	0.39	19.04
6	2.65	44.39		6	0.04	30.75
7	0.9	25.72		7	0.34	24.32
8	0.27	36.35		8	0.47	18.73
9	1.83	24.87		9	1.45	23.09
10	0.04	31.84		10	0.13	35.54
11	1.8092	29.888		11	0.12	27.57
12	8.17	41.27		12	0.27	34.45
13	0.38	20.99		13	0.68	25.25
14	0.55	23.89		14	2.33	37.16
15	1.11	26.61		15	0.71	29.64
16	1.68	25.46		16	9.03	36.88
17	0.31	25.75		17	0.46	23.54
18	2.644	28.132		18	0.34	24.63
19	0.954	22.432		19	1.48	25.43
20	1.83	21.271		20	3.02	37.71
21	3.372	27.323		21	4.35	32.97
22	2.496	26.082		22	4.585	31.802
23	1.819	22.742		23	2.348	23.093
24	1.098	24.219		24	1.065	21.429
25	1.369	26.277
Average	1.58885	28.1822		Average	1.47283	28.1935
Std	1.62658	6.3604		Std	2.01913	5.98259
Stde	0.325315	1.27208		Stde	0.412153	1.22119
