# Supplementary material for: Loss of Doc2b does not influence transmission at Purkinje cell to deep nuclei synapses under physiological conditions
Source: eLife. 2020 Apr 29;9:e55165. doi: 10.7554/eLife.55165 (PMC7190354; doi:10.7554/eLife.55165)
Supplement: Figure 2—source data 1. [file elife-55165-fig2-data1.xlsx]

## Sheet: Figure 2
Minimal stimulation data (Figure 2)
									cumulative histograms
Wildtype	IPSC	g (nS)		Doc2b KO	IPSC	g (nS)			Panel C - wildtype		Panel C - Doc2b KO
Cell #	Tau (ms)	avg		Cell #	Tau (ms)	avg			conductance (nS)	cumul. probability	conductance (nS)	cumul. probability
1	4.65116	78.8926		1	4.65116	36.0729			5.52568	0	6.1	0		2.19298	0	2	0
2	6.25	5.52568		2	4.65116	37.7212			5.52568	0.0322581	6.1	0.0344828		2.19298	0.0322581	2	0.0344828
3	3.0303	22.1388		3	4	32.2905			6.46	0.0322581	7.41	0.0344828		2.33	0.0322581	2.24	0.0344828
4	2.32558	50.3019		4	4.13223	19.9889			6.46	0.0645161	7.41	0.0689655		2.33	0.0645161	2.24	0.0689655
5	3.42466	25.5828		5	2.50627	57.1538			8.16	0.0645161	8.2	0.0689655		2.39808	0.0645161	2.27	0.0689655
6	3.07692	50.7369		6	2.27273	10.5973			8.16	0.0967742	8.2	0.103448		2.39808	0.0967742	2.27	0.103448
7	2.59067	38.5542		7	4.16667	33.8084			8.27	0.0967742	10.3152	0.103448		2.5	0.0967742	2.36	0.103448
8	2.5	57.1538		8	2.24215	41.8254			8.27	0.129032	10.3152	0.137931		2.5	0.129032	2.36	0.137931
9	3.07692	25.8415		9	2.55102	13.7579			8.53177	0.129032	10.5973	0.137931		2.53165	0.129032	2.48139	0.137931
10	4.16667	25.6336		10	3.7037	13.6085			8.53177	0.16129	10.5973	0.172414		2.53165	0.16129	2.48139	0.172414
11	3.83142	36.4271		11	4.04858	15.3506			9.43789	0.16129	13.6085	0.172414		2.53807	0.16129	2.51	0.172414
12	3.5461	31.6456		12	3.7037	32.9566			9.43789	0.193548	13.6085	0.206897		2.53807	0.193548	2.51	0.206897
13	6.25	14.5549		13	4.04858	15.9512			11.02	0.193548	13.7579	0.206897		2.59	0.193548	2.55	0.206897
14	3.55872	33.9376		14	6.25	27.551			11.02	0.225806	13.7579	0.241379		2.59	0.225806	2.55	0.241379
15	2.849	19.283		15	4.16667	10.3152			13.86	0.225806	14.37	0.241379		2.68817	0.225806	2.69542	0.241379
16	4.54545	13.8593		16	3.96825	48.4652			13.86	0.258065	14.37	0.275862		2.68817	0.258065	2.69542	0.275862
17	3.0303	43.8509		17	3.96825	42.0005			14.55	0.258065	14.49	0.275862		2.849	0.258065	3.28947	0.275862
18	3.93701	11.0157		18	3.869	42.0885			14.55	0.290323	14.49	0.310345		2.849	0.290323	3.28947	0.310345
19	3.08642	6.45728		19	3.84615	7.40956			19.28	0.290323	14.69	0.310345		2.97619	0.290323	3.33333	0.310345
20	3.67647	8.15995		20	2.36407	14.4855			19.28	0.322581	14.69	0.344828		2.97619	0.322581	3.33333	0.344828
21	2.68817	34.7257		21	3.33333	34.929			22.14	0.322581	15.35	0.344828		3.03	0.322581	3.62319	0.344828
22	2.97619	8.26755		22	2	24.7373			22.14	0.354839	15.35	0.37931		3.03	0.354839	3.62319	0.37931
23	2.53807	40.3531		23	2.69542	43.8662			24.1569	0.354839	15.95	0.37931		3.0303	0.354839	3.63636	0.37931
24	3.41297	45.7815		24	3.7037	14.3721			24.1569	0.387097	15.95	0.413793		3.0303	0.387097	3.63636	0.413793
25	4.14938	9.43789		25	2.48139	6.10228			25.58	0.387097	19.9889	0.413793		3.08	0.387097	3.7	0.413793
26	2.53165	43.9979		26	5.26316	52.8043			25.58	0.419355	19.9889	0.448276		3.08	0.451613	3.7	0.482759
27	2.39808	46.4476		27	3.62319	14.6851			25.63	0.419355	24.74	0.448276		3.08642	0.451613	3.7037	0.482759
28	2.19298	24.1569		28	3.63636	25.132			25.63	0.451613	24.74	0.482759		3.08642	0.483871	3.7037	0.517241
29	3.38983	68.3749		29	3.28947	8.19514			25.84	0.451613	25.13	0.482759		3.11	0.483871	3.84615	0.517241
30	3.20513	8.53177							25.84	0.483871	25.13	0.517241		3.11	0.516129	3.84615	0.551724
									31.65	0.483871	27.55	0.517241		3.20513	0.516129	3.869	0.551724
									31.65	0.516129	27.55	0.551724		3.20513	0.548387	3.869	0.586207
									33.94	0.516129	32.2905	0.551724		3.38983	0.548387	3.96825	0.586207
Average	3.42954	30.9876		Average	3.62539	26.8352			33.94	0.548387	32.2905	0.586207		3.38983	0.580645	3.96825	0.655172
Std	0.98369	18.8815		Std	0.949277	14.6474			34.73	0.548387	32.96	0.586207		3.41297	0.580645	4	0.655172
Stde	0.179596	3.44727		Stde	0.176276	2.71994			34.73	0.580645	32.96	0.62069		3.41297	0.612903	4	0.689655
									36.43	0.580645	33.8084	0.62069		3.42	0.612903	4.05	0.689655
									36.43	0.612903	33.8084	0.655172		3.42	0.645161	4.05	0.758621
									38.55	0.612903	34.93	0.655172		3.5461	0.645161	4.13	0.758621
									38.55	0.645161	34.93	0.689655		3.5461	0.677419	4.13	0.793103
									40.35	0.645161	36.07	0.689655		3.55872	0.677419	4.16667	0.793103
									40.35	0.677419	36.07	0.724138		3.55872	0.709677	4.16667	0.827586
									43.85	0.677419	37.7212	0.724138		3.67647	0.709677	4.17	0.827586
									43.85	0.709677	37.7212	0.758621		3.67647	0.741935	4.17	0.862069
									43.9979	0.709677	41.8254	0.758621		3.83	0.741935	4.65	0.862069
									43.9979	0.741935	41.8254	0.793103		3.83	0.774194	4.65	0.931034
									45.7815	0.741935	42	0.793103		3.93701	0.774194	5.26316	0.931034
									45.7815	0.774194	42	0.827586		3.93701	0.806452	5.26316	0.965517
									46.4476	0.774194	42.09	0.827586		4.14938	0.806452	6.25	0.965517
									46.4476	0.806452	42.09	0.862069		4.14938	0.83871	6.25	1
									50.3	0.806452	43.87	0.862069		4.17	0.83871	inf	1
									50.3	0.83871	43.87	0.896552		4.17	0.870968
									50.74	0.83871	48.4652	0.896552		4.54545	0.870968
									50.74	0.870968	48.4652	0.931034		4.54545	0.903226
									57.15	0.870968	52.8	0.931034		4.65	0.903226
									57.15	0.903226	52.8	0.965517		4.65	0.935484
									68.3749	0.903226	57.1538	0.965517		6.25	0.935484
									68.3749	0.935484	57.1538	1		6.25	1
									78.89	0.935484	inf	1		inf	1
									78.89	0.967742
									90.2951	0.967742
									90.2951	1

## Sheet: Fig 2-S1
Histograms in panels E and F
Wildtype	failures	successes		Doc2b KO	failures	successes
x-axis	y-axis	y-axis		x-axis	y-axis	y-axis
0.95	27	35		0.95	40	28
0.951	29	38		0.951	32	21
0.952	44	44		0.952	28	23
0.953	37	45		0.953	23	22
0.954	24	45		0.954	31	20
0.955	39	37		0.955	25	23
0.956	33	34		0.956	26	33
0.957	42	42		0.957	39	22
0.958	24	34		0.958	19	28
0.959	31	36		0.959	34	29
0.96	41	38		0.96	47	26
0.961	34	48		0.961	25	23
0.962	32	42		0.962	42	19
0.963	39	32		0.963	43	26
0.964	30	41		0.964	35	27
0.965	30	40		0.965	35	21
0.966	39	29		0.966	37	24
0.967	39	41		0.967	33	26
0.968	44	34		0.968	34	25
0.969	26	45		0.969	47	17
0.97	45	35		0.97	31	22
0.971	35	38		0.971	36	21
0.972	29	26		0.972	28	27
0.973	29	41		0.973	36	26
0.974	36	38		0.974	29	25
0.975	39	44		0.975	41	25
0.976	32	49		0.976	39	29
0.977	44	34		0.977	51	28
0.978	33	40		0.978	30	21
0.979	39	36		0.979	32	30
0.98	38	33		0.98	26	26
0.981	28	44		0.981	21	29
0.982	39	47		0.982	30	27
0.983	37	33		0.983	33	16
0.984	26	33		0.984	18	20
0.985	25	37		0.985	30	16
0.986	25	35		0.986	44	27
0.987	36	33		0.987	30	26
0.988	28	46		0.988	23	33
0.989	40	33		0.989	33	28
0.99	36	42		0.99	35	29
0.991	38	33		0.991	38	35
0.992	28	43		0.992	24	22
0.993	26	31		0.993	33	23
0.994	45	28		0.994	55	19
0.995	29	52		0.995	23	23
0.996	34	50		0.996	34	29
0.997	28	46		0.997	37	21
0.998	44	49		0.998	30	20
0.999	17	19		0.999	11	8
1	0	0		1	-6	0
1.001	0	0		1.001	-6	0
1.002	0	0		1.002	-6	0
1.003	0	0		1.003	-6	1
1.004	31	8		1.004	36	9
1.005	26	2		1.005	21	1
1.006	37	17		1.006	20	13
1.007	25	4		1.007	33	7
1.008	35	24		1.008	35	19
1.009	31	21		1.009	25	4
1.01	38	15		1.01	29	13
1.011	30	18		1.011	32	8
1.012	43	21		1.012	33	21
1.013	34	25		1.013	40	11
1.014	37	26		1.014	37	15
1.015	36	29		1.015	41	26
1.016	34	31		1.016	27	19
1.017	33	29		1.017	21	22
1.018	33	30		1.018	34	10
1.019	36	29		1.019	42	20
1.02	31	35		1.02	30	17
1.021	49	41		1.021	31	26
1.022	25	37		1.022	27	19
1.023	24	44		1.023	27	26
1.024	44	30		1.024	39	23
1.025	33	47		1.025	36	21
1.026	39	38		1.026	29	18
1.027	30	37		1.027	29	19
1.028	29	40		1.028	35	30
1.029	31	35		1.029	25	25
1.03	30	43		1.03	37	17
1.031	34	29		1.031	32	22
1.032	41	44		1.032	39	28
1.033	26	28		1.033	28	32
1.034	34	40		1.034	49	26
1.035	37	35		1.035	28	11
1.036	22	36		1.036	16	28
1.037	41	34		1.037	22	29
1.038	40	39		1.038	31	28
1.039	29	45		1.039	27	27

## Sheet: Fig 2-S2
Histograms in panels E and F
Wildtype			Doc2b KO
x-axis	y-axis		x-axis	y-axis
0.8	31		0.8	30
0.801	30		0.801	28
0.802	36		0.802	19
0.803	25		0.803	19
0.804	35		0.804	26
0.805	25		0.805	35
0.806	22		0.806	32
0.807	20		0.807	30
0.808	20		0.808	25
0.809	20		0.809	22
0.81	35		0.81	21
0.811	26		0.811	35
0.812	27		0.812	23
0.813	28		0.813	25
0.814	27		0.814	29
0.815	29		0.815	24
0.816	18		0.816	26
0.817	21		0.817	28
0.818	27		0.818	21
0.819	25		0.819	34
0.82	27		0.82	28
0.821	23		0.821	18
0.822	26		0.822	26
0.823	31		0.823	18
0.824	19		0.824	21
0.825	29		0.825	25
0.826	35		0.826	26
0.827	24		0.827	25
0.828	22		0.828	31
0.829	29		0.829	28
0.83	18		0.83	23
0.831	32		0.831	25
0.832	29		0.832	21
0.833	22		0.833	29
0.834	17		0.834	32
0.835	33		0.835	28
0.836	32		0.836	26
0.837	30		0.837	29
0.838	29		0.838	32
0.839	32		0.839	25
0.84	35		0.84	18
0.841	25		0.841	21
0.842	22		0.842	25
0.843	21		0.843	26
0.844	34		0.844	26
0.845	25		0.845	26
0.846	36		0.846	19
0.847	35		0.847	27
0.848	27		0.848	30
0.849	22		0.849	28
0.85	31		0.85	33
0.851	28		0.851	23
0.852	19		0.852	23
0.853	29		0.853	20
0.854	29		0.854	28
0.855	26		0.855	21
0.856	27		0.856	19
0.857	34		0.857	23
0.858	29		0.858	23
0.859	24		0.859	29
0.86	28		0.86	20
0.861	24		0.861	18
0.862	23		0.862	25
0.863	20		0.863	28
0.864	26		0.864	26
0.865	30		0.865	29
0.866	25		0.866	32
0.867	25		0.867	21
0.868	24		0.868	36
0.869	27		0.869	27
0.87	39		0.87	27
0.871	30		0.871	29
0.872	26		0.872	31
0.873	22		0.873	28
0.874	25		0.874	32
0.875	26		0.875	15
0.876	32		0.876	33
0.877	23		0.877	19
0.878	29		0.878	24
0.879	19		0.879	30
0.88	26		0.88	18
0.881	21		0.881	24
0.882	31		0.882	26
0.883	30		0.883	31
0.884	32		0.884	20
0.885	29		0.885	35
0.886	17		0.886	25
0.887	31		0.887	20
0.888	29		0.888	26
0.889	27		0.889	26
0.89	20		0.89	37
0.891	28		0.891	23
0.892	27		0.892	37
0.893	23		0.893	19
0.894	35		0.894	28
0.895	24		0.895	16
0.896	24		0.896	33
0.897	20		0.897	25
0.898	22		0.898	30
0.899	30		0.899	23
0.9	31		0.9	24
0.901	28		0.901	34
0.902	22		0.902	23
0.903	32		0.903	18
0.904	24		0.904	27
0.905	26		0.905	18
0.906	23		0.906	28
0.907	24		0.907	31
0.908	30		0.908	32
0.909	22		0.909	29
0.91	23		0.91	21
0.911	19		0.911	21
0.912	26		0.912	21
0.913	26		0.913	15
0.914	23		0.914	33
0.915	28		0.915	33
0.916	23		0.916	31
0.917	23		0.917	27
0.918	27		0.918	28
0.919	28		0.919	18
0.92	23		0.92	23
0.921	23		0.921	30
0.922	32		0.922	24
0.923	21		0.923	24
0.924	26		0.924	37
0.925	26		0.925	33
0.926	24		0.926	26
0.927	29		0.927	29
0.928	22		0.928	24
0.929	25		0.929	27
0.93	36		0.93	28
0.931	29		0.931	37
0.932	23		0.932	29
0.933	28		0.933	21
0.934	25		0.934	25
0.935	27		0.935	23
0.936	28		0.936	27
0.937	28		0.937	22
0.938	15		0.938	37
0.939	25		0.939	22
0.94	28		0.94	25
0.941	24		0.941	31
0.942	35		0.942	27
0.943	31		0.943	30
0.944	29		0.944	29
0.945	24		0.945	20
0.946	20		0.946	24
0.947	22		0.947	29
0.948	22		0.948	26
0.949	22		0.949	23
0.95	28		0.95	19
0.951	38		0.951	30
0.952	30		0.952	23
0.953	21		0.953	28
0.954	36		0.954	30
0.955	27		0.955	23
0.956	25		0.956	25
0.957	20		0.957	20
0.958	31		0.958	33
0.959	24		0.959	38
0.96	22		0.96	31
0.961	26		0.961	21
0.962	29		0.962	21
0.963	27		0.963	24
0.964	18		0.964	29
0.965	22		0.965	29
0.966	24		0.966	21
0.967	27		0.967	30
0.968	23		0.968	26
0.969	21		0.969	28
0.97	23		0.97	27
0.971	30		0.971	28
0.972	28		0.972	19
0.973	22		0.973	25
0.974	27		0.974	28
0.975	21		0.975	20
0.976	29		0.976	27
0.977	29		0.977	37
0.978	25		0.978	23
0.979	18		0.979	28
0.98	32		0.98	21
0.981	23		0.981	29
0.982	29		0.982	19
0.983	23		0.983	29
0.984	26		0.984	19
0.985	30		0.985	38
0.986	27		0.986	19
0.987	22		0.987	34
0.988	23		0.988	20
0.989	23		0.989	45
0.99	19		0.99	27
0.991	21		0.991	37
0.992	26		0.992	32
0.993	34		0.993	30
0.994	25		0.994	25
0.995	37		0.995	17
0.996	30		0.996	40
0.997	29		0.997	31
0.998	29		0.998	21
0.999	16		0.999	8
1	0		1	0
1.001	0		1.001	13
1.002	0		1.002	0
1.003	0		1.003	0
1.004	0		1.004	2
1.005	0		1.005	0
1.006	0		1.006	0
1.007	0		1.007	0
1.008	0		1.008	1
1.009	0		1.009	2
1.01	0		1.01	0
1.011	1		1.011	0
1.012	0		1.012	0
1.013	0		1.013	0
1.014	0		1.014	0
1.015	0		1.015	1
1.016	0		1.016	0
1.017	2		1.017	0
1.018	0		1.018	1
1.019	1		1.019	0
1.02	0		1.02	0
1.021	0		1.021	0
1.022	1		1.022	0
1.023	0		1.023	1
1.024	0		1.024	0
1.025	0		1.025	1
1.026	0		1.026	0
1.027	0		1.027	0
1.028	2		1.028	0
1.029	0		1.029	3
1.03	0		1.03	0
1.031	0		1.031	0
1.032	0		1.032	2
1.033	0		1.033	0
1.034	1		1.034	0
1.035	1		1.035	0
1.036	1		1.036	0
1.037	0		1.037	1
1.038	2		1.038	0
1.039	0		1.039	0
1.04	0		1.04	6
1.041	2		1.041	2
1.042	3		1.042	4
1.043	0		1.043	1
1.044	3		1.044	4
1.045	3		1.045	9
1.046	1		1.046	8
1.047	2		1.047	5
1.048	5		1.048	6
1.049	7		1.049	7
1.05	14		1.05	11
1.051	12		1.051	13
1.052	7		1.052	14
1.053	10		1.053	12
1.054	9		1.054	21
1.055	16		1.055	11
1.056	17		1.056	13
1.057	11		1.057	22
1.058	13		1.058	20
1.059	16		1.059	19
1.06	27		1.06	20
1.061	11		1.061	17
1.062	21		1.062	13
1.063	16		1.063	13
1.064	18		1.064	21
1.065	26		1.065	15
1.066	19		1.066	30
1.067	23		1.067	21
1.068	23		1.068	21
1.069	25		1.069	17
1.07	25		1.07	22
1.071	20		1.071	20
1.072	14		1.072	24
1.073	22		1.073	24
1.074	14		1.074	22
1.075	23		1.075	23
1.076	29		1.076	31
1.077	23		1.077	19
1.078	20		1.078	26
1.079	25		1.079	13
1.08	16		1.08	28
1.081	28		1.081	21
1.082	18		1.082	23
1.083	20		1.083	34
1.084	38		1.084	11
1.085	29		1.085	30
1.086	32		1.086	22
1.087	24		1.087	27
1.088	22		1.088	18
1.089	20		1.089	20
1.09	25		1.09	21
1.091	22		1.091	18
1.092	27		1.092	20
1.093	18		1.093	25
1.094	26		1.094	32
1.095	29		1.095	25
1.096	34		1.096	28
1.097	24		1.097	28
1.098	20		1.098	31
1.099	24		1.099	25
1.1	27		1.1	23
1.101	30		1.101	16
1.102	27		1.102	26
1.103	29		1.103	21
1.104	24		1.104	31
1.105	22		1.105	25
1.106	22		1.106	24
1.107	35		1.107	21
1.108	28		1.108	19
1.109	32		1.109	27
1.11	30		1.11	30
1.111	24		1.111	25
1.112	18		1.112	23
1.113	23		1.113	32
1.114	15		1.114	27
1.115	22		1.115	31
1.116	27		1.116	31
1.117	23		1.117	28
1.118	19		1.118	30
1.119	33		1.119	24
1.12	32		1.12	32
1.121	22		1.121	21
1.122	18		1.122	23
1.123	38		1.123	21
1.124	30		1.124	25
1.125	26		1.125	19
1.126	29		1.126	25
1.127	22		1.127	31
1.128	31		1.128	27
1.129	20		1.129	36
1.13	32		1.13	22
1.131	29		1.131	22
1.132	23		1.132	27
1.133	22		1.133	27
1.134	23		1.134	29
1.135	30		1.135	32
1.136	34		1.136	27
1.137	33		1.137	22
1.138	27		1.138	23
1.139	24		1.139	27
1.14	22		1.14	28
1.141	29		1.141	26
1.142	25		1.142	23
1.143	17		1.143	20
1.144	26		1.144	31
1.145	27		1.145	30
1.146	26		1.146	32
1.147	34		1.147	25
1.148	25		1.148	32
1.149	24		1.149	25
1.15	29		1.15	30
1.151	15		1.151	30
1.152	32		1.152	22
1.153	26		1.153	16
1.154	16		1.154	20
1.155	32		1.155	29
1.156	32		1.156	25
1.157	27		1.157	19
1.158	27		1.158	26
1.159	24		1.159	25
1.16	24		1.16	30
1.161	23		1.161	22
1.162	31		1.162	31
1.163	29		1.163	31
1.164	16		1.164	27
1.165	19		1.165	30
1.166	20		1.166	24
1.167	28		1.167	28
1.168	18		1.168	31
1.169	20		1.169	28
1.17	30		1.17	21
1.171	34		1.171	23
1.172	27		1.172	26
1.173	19		1.173	26
1.174	24		1.174	24
1.175	33		1.175	36
1.176	26		1.176	31
1.177	32		1.177	29
1.178	25		1.178	30
1.179	21		1.179	24
1.18	22		1.18	18
1.181	24		1.181	21
1.182	27		1.182	20
1.183	17		1.183	29
1.184	33		1.184	18
1.185	20		1.185	27
1.186	29		1.186	25
1.187	21		1.187	25
1.188	27		1.188	26
1.189	18		1.189	29
1.19	27		1.19	27
1.191	24		1.191	24
1.192	25		1.192	31
1.193	22		1.193	22
1.194	27		1.194	30
1.195	23		1.195	23
1.196	40		1.196	33
1.197	24		1.197	26
1.198	26		1.198	29
1.199	26		1.199	22
1.2	31		1.2	27
1.201	29		1.201	30
1.202	13		1.202	19
1.203	31		1.203	24
1.204	27		1.204	33
1.205	28		1.205	23
1.206	25		1.206	24
1.207	21		1.207	27
1.208	36		1.208	23
1.209	29		1.209	21
1.21	32		1.21	32
1.211	20		1.211	31
1.212	24		1.212	27
1.213	27		1.213	27
1.214	25		1.214	29
1.215	23		1.215	27
1.216	26		1.216	24
1.217	23		1.217	22
1.218	27		1.218	30
1.219	24		1.219	26
1.22	20		1.22	19
1.221	26		1.221	30
1.222	31		1.222	30
1.223	25		1.223	24
1.224	21		1.224	25
1.225	17		1.225	25
1.226	31		1.226	31
1.227	22		1.227	20
1.228	22		1.228	23
1.229	44		1.229	21
1.23	20		1.23	23
1.231	24		1.231	20
1.232	26		1.232	23
1.233	21		1.233	26
1.234	31		1.234	33
1.235	37		1.235	20
1.236	36		1.236	33
1.237	24		1.237	31
1.238	34		1.238	24
1.239	25		1.239	22
1.24	23		1.24	26
1.241	28		1.241	23
1.242	24		1.242	28
1.243	25		1.243	39
1.244	27		1.244	16
1.245	21		1.245	24
1.246	27		1.246	27
1.247	36		1.247	30
1.248	23		1.248	24
1.249	22		1.249	33
1.25	27		1.25	29
1.251	25		1.251	23
1.252	33		1.252	26
1.253	22		1.253	19
1.254	22		1.254	28
1.255	40		1.255	23
1.256	16		1.256	24
1.257	31		1.257	30
1.258	30		1.258	19
1.259	25		1.259	21
1.26	24		1.26	24
1.261	32		1.261	27
1.262	28		1.262	29
1.263	21		1.263	18
1.264	30		1.264	21
1.265	34		1.265	21
1.266	30		1.266	22
1.267	26		1.267	32
1.268	38		1.268	12
1.269	19		1.269	29
1.27	24		1.27	37
1.271	26		1.271	22
1.272	23		1.272	27
1.273	20		1.273	25
1.274	28		1.274	24
1.275	28		1.275	32
1.276	18		1.276	29
1.277	29		1.277	13
1.278	30		1.278	27
1.279	19		1.279	27
1.28	20		1.28	31
1.281	21		1.281	22
1.282	32		1.282	28
1.283	23		1.283	22
1.284	27		1.284	24
1.285	17		1.285	26
1.286	30		1.286	23
1.287	30		1.287	33
1.288	15		1.288	27
1.289	32		1.289	22
1.29	30		1.29	29
1.291	23		1.291	24
1.292	34		1.292	36
1.293	21		1.293	29
1.294	26		1.294	20
1.295	21		1.295	29
1.296	27		1.296	29
1.297	27		1.297	26
1.298	24		1.298	24
1.299	30		1.299	17
1.3			1.3
