# Supplementary material for: Loss of Doc2b does not influence transmission at Purkinje cell to deep nuclei synapses under physiological conditions
Source: eLife. 2020 Apr 29;9:e55165. doi: 10.7554/eLife.55165 (PMC7190354; doi:10.7554/eLife.55165)
Supplement: Figure 3—source data 1. [file elife-55165-fig3-data1.xlsx]

## Sheet: Figure 3 C-E
Train data for PC-DCN (juvenile)
Panel C
PPR	Wildtype		PPR	Doc2b KO
ISI	average	STE	ISI	average	STE
10	0.8619	0.0197185	10	0.9065	0.0240723
20	0.8884	0.0167862	20	0.8941	0.0272123
50	0.8466	0.0201996	50	0.8371	0.023998
100	0.8153	0.032499	100	0.8303	0.0495631
200	0.4969	0.0367664	200	0.597	0.0433578
Panel D
Steady-state	Wildtype		Steady-state	Doc2b KO
Frequency	average	STE	Frequency	average	STE
5	0.5245	0.0208751	5	0.493296	0.0348808
10	0.4983	0.0244822	10	0.457974	0.0378167
20	0.4575	0.0280636	20	0.401956	0.0330962
50	0.3708	0.0196897	50	0.347567	0.0337887
100	0.2524	0.0175805	100	0.243941	0.0293824
Panel E
Lambda	Wildtype		Lambda	Doc2b KO
Frequency	average	STE	Frequency	average	STE
5	3.7125	0.21455	5	3.9576	0.302279
10	4.53571	0.301388	10	4.7725	0.407859
20	5.8084	0.357315	20	6.3249	0.91604
50	6.2528	0.697456	50	7.3608	0.603624
100	9.2581	0.755627	100	8.4724	0.502629
