# Supplementary material for: Loss of Doc2b does not influence transmission at Purkinje cell to deep nuclei synapses under physiological conditions
Source: eLife. 2020 Apr 29;9:e55165. doi: 10.7554/eLife.55165 (PMC7190354; doi:10.7554/eLife.55165)
Supplement: Figure 4—source data 1. [file elife-55165-fig4-data1.xlsx]

## Sheet: Figure 4
Train data for PC-DCN (adult)
Panel C							Panel F	Wildtype			Doc2b KO
							x-axis (stim no.)	IPSC (norm).	STE		IPSC (norm).	STE
Steady-state	Wildtype		Steady-state	Doc2b KO			1	1	0		1	0
Frequency	average	STE	Frequency	average	STE		2	1.01777	0.0548673		1.06936	0.0334382
5	0.4798	0.0248622	5	0.507367	0.0282887		3	0.985073	0.0598555		1.032	0.0345192
10	0.4847	0.0260471	10	0.450143	0.0208335		4	0.911367	0.0606238		0.973308	0.0285846
20	0.4821	0.0248504	20	0.433091	0.0244214		5	0.880903	0.0317265		0.90848	0.0207113
50	0.4693	0.0210676	50	0.451792	0.0347336		6	0.83107	0.0368918		0.851979	0.0211105
100	0.4493	0.0251494	100	0.446907	0.0293828		7	0.793467	0.0235785		0.791672	0.0276096
							8	0.744729	0.0230541		0.747969	0.0204203
Panel D							9	0.696084	0.025442		0.705869	0.0215907
							10	0.680322	0.0233844		0.663902	0.0251977
Lambda	Wildtype		Lambda	Doc2b KO			11	0.664478	0.0145183		0.666865	0.0266555
Frequency	average	STE	Frequency	average	STE		12	0.619503	0.0158731		0.616221	0.0263256
5	3.7125	0.21455	5	3.8215	0.328831		13	0.579661	0.0246756		0.595432	0.0345577
10	4.53571	0.301388	10	4.5158	0.371018		14	0.563676	0.0164368		0.559328	0.0323987
20	5.8084	0.357315	20	5.3209	0.627938		15	0.558267	0.0198861		0.547935	0.0345997
50	6.2528	0.697456	50	7.0449	0.671857		16	0.550134	0.0144984		0.514787	0.030583
100	9.2581	0.755627	100	8.5689	0.618958		17	0.540431	0.0176744		0.492043	0.0267074
							18	0.529536	0.017252		0.503763	0.0317015
							19	0.510036	0.01422		0.465873	0.0325276
							20	0.48833	0.018211		0.467024	0.0360717
							21	0.494641	0.0147772		0.474163	0.0374857
							22	0.473594	0.023606		0.441948	0.0366954
							23	0.451146	0.0198895		0.442219	0.0359572
							24	0.457464	0.0196157		0.437281	0.0379238
							25	0.467485	0.0164737		0.436418	0.031874
							26	0.433339	0.0260647		0.416025	0.0371501
							27	0.431826	0.0339574		0.402256	0.0338814
							28	0.446508	0.0225252		0.396058	0.02596
							29	0.434493	0.0254058		0.405484	0.0298232
							30	0.443381	0.0249508		0.419754	0.0354415
							31	0.429266	0.02813		0.421767	0.0395906
							32	0.43803	0.028047		0.406878	0.0355072
							33	0.43521	0.0209554		0.402051	0.0348951
							34	0.42439	0.0287332		0.383026	0.0292476
							35	0.430149	0.0240422		0.408059	0.0316573
							36	0.419996	0.022885		0.376316	0.032433
							37	0.409045	0.0305807		0.387674	0.036501
							38	0.423301	0.020661		0.39866	0.0319393
							39	0.408383	0.0239546		0.403506	0.0389908
							40	0.423717	0.0322738		0.387273	0.0379358
							41	0.398245	0.0300795		0.385709	0.0392149
							42	0.396119	0.0312792		0.386513	0.0364935
							43	0.388271	0.037129		0.374443	0.0403034
							44	0.398386	0.0299059		0.396189	0.0393109
							45	0.400479	0.0288087		0.367858	0.0376263
							46	0.39815	0.027762		0.383146	0.0326774
							47	0.404393	0.0269496		0.386988	0.039716
							48	0.406517	0.0376551		0.370037	0.0377149
							49	0.387045	0.0329929		0.40026	0.0390313
							50	0.396327	0.0340163		0.407703	0.0398209
							51	0.428338	0.0237866		0.379873	0.0166909
							52	0.402819	0.0328683		0.378539	0.0258403
							53	0.409232	0.0406421		0.407381	0.026321
							54	0.429347	0.0237895		0.373638	0.0206578
							55	0.414632	0.0248971		0.389226	0.006575
							56	0.409663	0.0125301		0.382214	0.0158192
							57	0.414484	0.0139808		0.376094	0.0229215
							58	0.415783	0.0216498		0.403286	0.0278333
							59	0.418821	0.025771		0.386448	0.0249164
							60	0.406341	0.0261801		0.383037	0.0145498
							61	0.412543	0.0305954		0.37428	0.024898
							62	0.416696	0.0145968		0.366192	0.0176029
							63	0.378159	0.0280779		0.383238	0.0186653
							64	0.417102	0.0272468		0.375984	0.0190758
							65	0.406422	0.0322227		0.391786	0.0262784
							66	0.403432	0.0305867		0.372351	0.0179358
							67	0.407367	0.0186173		0.365645	0.0109339
							68	0.415352	0.0321915		0.376148	0.0237296
							69	0.396982	0.0217857		0.377281	0.017911
							70	0.396147	0.0291868		0.360464	0.0111257
							71	0.388027	0.0255		0.384177	0.0176712
							72	0.397306	0.0300108		0.350597	0.0191275
							73	0.376864	0.0253167		0.374683	0.0147014
							74	0.386299	0.0212602		0.365379	0.0110907
							75	0.410409	0.0165553		0.37232	0.00304719
							76	0.378219	0.0277061		0.362072	0.0170475
							77	0.372864	0.0328979		0.39362	0.0141494
							78	0.388977	0.0257136		0.366058	0.0248466
							79	0.364961	0.0330288		0.369888	0.0139851
							80	0.380552	0.0236626		0.337799	0.0315337
							81	0.378777	0.0206086		0.346465	0.0184392
							82	0.386773	0.0232151		0.36815	0.0304856
							83	0.374539	0.0403505		0.358813	0.0109248
							84	0.403658	0.0213761		0.362403	0.00120643
							85	0.377892	0.0278378		0.359616	0.013156
							86	0.401147	0.0227409		0.347988	0.0232038
							87	0.358661	0.0308959		0.350347	0.0249425
							88	0.368321	0.0365744		0.365976	0.017603
							89	0.384566	0.0421632		0.392942	0.0355286
							90	0.365339	0.0436666		0.344463	0.0296511
							91	0.375772	0.0368937		0.373858	0.0181752
							92	0.379516	0.0285183		0.375057	0.0217691
							93	0.376081	0.0379847		0.381562	0.0360004
							94	0.375004	0.0257151		0.353924	0.0238737
							95	0.363427	0.0405846		0.373443	0.00264862
							96	0.378061	0.0309139		0.386768	0.0200284
							97	0.348267	0.0363195		0.376989	0.0287078
							98	0.36676	0.0230082		0.374886	0.0192733
							99	0.38498	0.0238585		0.350324	0.0195138
							100	0.365629	0.042901		0.36184	0.00887578
							101	0.362911	0.0245365		0.398181	0.0804791
							102	0.374513	0.0252713		0.366317	0.0519674
							103	0.374706	0.0310729		0.354438	0.040791
							104	0.385365	0.0340331		0.369799	0.0547554
							105	0.399302	0.0233696		0.356736	0.0477557
							106	0.39706	0.0279122		0.381271	0.0473811
							107	0.391811	0.024123		0.384827	0.044417
							108	0.397785	0.0284604		0.379715	0.0413059
							109	0.408065	0.0276223		0.375042	0.0368293
							110	0.383097	0.0297118		0.383994	0.040816
							111	0.410491	0.0284621		0.380405	0.0406803
							112	0.406645	0.0296323		0.37595	0.0348545
							113	0.414691	0.0229434		0.389584	0.0379351
							114	0.396228	0.0311335		0.381942	0.0427056
							115	0.396154	0.0254464		0.385784	0.0408518
							116	0.406751	0.0236222		0.385623	0.0422015
							117	0.426934	0.0196537		0.391206	0.0413154
							118	0.401884	0.020554		0.404523	0.0403827
							119	0.408597	0.0190021		0.404953	0.0467697
							120	0.404457	0.0247408		0.394954	0.0372704
							121	0.418982	0.0256777		0.384838	0.0267289
							122	0.417438	0.0229423		0.408719	0.0330076
							123	0.415637	0.0282474		0.382586	0.033656
							124	0.411933	0.0220814		0.410741	0.0435321
							125	0.424561	0.023594		0.397116	0.0407795
							126	0.442001	0.0245271		0.406751	0.0365245
							127	0.420559	0.0200515		0.403989	0.0298154
							128	0.410112	0.0287599		0.398234	0.0331069
							129	0.415632	0.0230829		0.40271	0.0320735
							130	0.411574	0.0229056		0.391716	0.0306941
							131	0.416567	0.0256932		0.41851	0.0311602
							132	0.410743	0.0270858		0.386646	0.0295153
							133	0.422068	0.0236769		0.397072	0.0265465
							134	0.414981	0.0242051		0.417493	0.0354439
							135	0.410831	0.0182621		0.4035	0.0311617
							136	0.428226	0.021422		0.401654	0.0314338
							137	0.423405	0.0286637		0.415789	0.0446339
							138	0.418892	0.0270529		0.405134	0.030222
							139	0.409174	0.0266667		0.41656	0.0403653
							140	0.409137	0.0239798		0.400705	0.0308367
							141	0.420786	0.0269108		0.409625	0.0327457
							142	0.418037	0.0246518		0.398826	0.0346374
							143	0.419411	0.0280762		0.397644	0.0348971
							144	0.421609	0.0263128		0.414474	0.0288719
							145	0.408658	0.0309187		0.424219	0.0313765
							146	0.414363	0.0255452		0.409306	0.0351431
							147	0.41166	0.0319929		0.395267	0.0324587
							148	0.422341	0.0259409		0.40186	0.0360599
							149	0.41371	0.0303946		0.415039	0.0357506
							150	0.423536	0.0288678		0.395073	0.0349105
							151	0.432561	0.0230573		0.396089	0.0272102
							152	0.516308	0.0291523		0.534006	0.0266085
							153	0.546479	0.0276401		0.570251	0.0184816
							154	0.54477	0.0264926		0.551815	0.0352068
							155	0.539621	0.0249906		0.568969	0.0273087
							156	0.520384	0.032971		0.55737	0.0286757
							157	0.532492	0.0271927		0.538411	0.0277752
							158	0.50686	0.0228181		0.517134	0.0286437
							159	0.501828	0.0267781		0.505116	0.0320574
							160	0.483275	0.0268934		0.490521	0.0286263
							161	0.470911	0.0259533		0.475541	0.0296454
							162	0.470337	0.0291317		0.494324	0.0436563
							163	0.439484	0.0337519		0.451021	0.0377196
							164	0.441751	0.0275151		0.448932	0.0369559
							165	0.43837	0.0243698		0.452369	0.029733
							166	0.425013	0.0242153		0.452465	0.0362701
							167	0.438469	0.0226409		0.428783	0.0312608
							168	0.416395	0.0282267		0.43701	0.0395031
							169	0.421065	0.0284585		0.420949	0.0313174
							170	0.40404	0.0302116		0.406255	0.0374324
							171	0.398546	0.0284878		0.398675	0.0347896
							172	0.376309	0.031085		0.398083	0.0380471
							173	0.405895	0.0254232		0.397753	0.0328016
							174	0.386245	0.02631		0.389711	0.0355666
							175	0.372366	0.0258642		0.395488	0.0421093
							176	0.383826	0.0312154		0.396882	0.0432147
							177	0.356744	0.0261388		0.388667	0.0379034
							178	0.376129	0.0289194		0.374018	0.0377153
							179	0.354826	0.0366745		0.379262	0.044557
							180	0.363696	0.0281138		0.376099	0.03771
							181	0.373091	0.0409217		0.360141	0.0419313
							182	0.365913	0.0301088		0.374741	0.0316609
							183	0.372933	0.0343355		0.372095	0.0433114
							184	0.348539	0.0383789		0.354657	0.0381412
							185	0.353364	0.0392914		0.359375	0.0439875
							186	0.361901	0.0403467		0.377019	0.0418895
							187	0.358764	0.0362059		0.355966	0.04085
							188	0.355874	0.0375254		0.350187	0.0407338
							189	0.350898	0.03619		0.35123	0.0410518
							190	0.332696	0.0346905		0.350128	0.0389844
							191	0.339409	0.0315486		0.349116	0.0400435
							192	0.339915	0.0296317		0.358372	0.0428152
							193	0.343795	0.0331492		0.354485	0.0394919
							194	0.338055	0.0333116		0.363326	0.0502617
							195	0.359938	0.0377977		0.355406	0.0501413
							196	0.352945	0.0375875		0.351775	0.0433907
							197	0.355979	0.0383795		0.358504	0.0477614
							198	0.339677	0.0336902		0.347705	0.0397558
							199	0.334776	0.0390103		0.352071	0.0465908
							200	0.346448	0.0347876		0.357718	0.0490462
